# Supplementary material for: Morphophysiological and Biochemical Responses of Zea mays L. under Cadmium and Drought Stresses Integrated with Fungal and Bacterial Inoculation
Source: MDPI journal article supplement (doi:10.3390/agronomy13071675), 2023-06-21
Supplement: s1 [file s1]

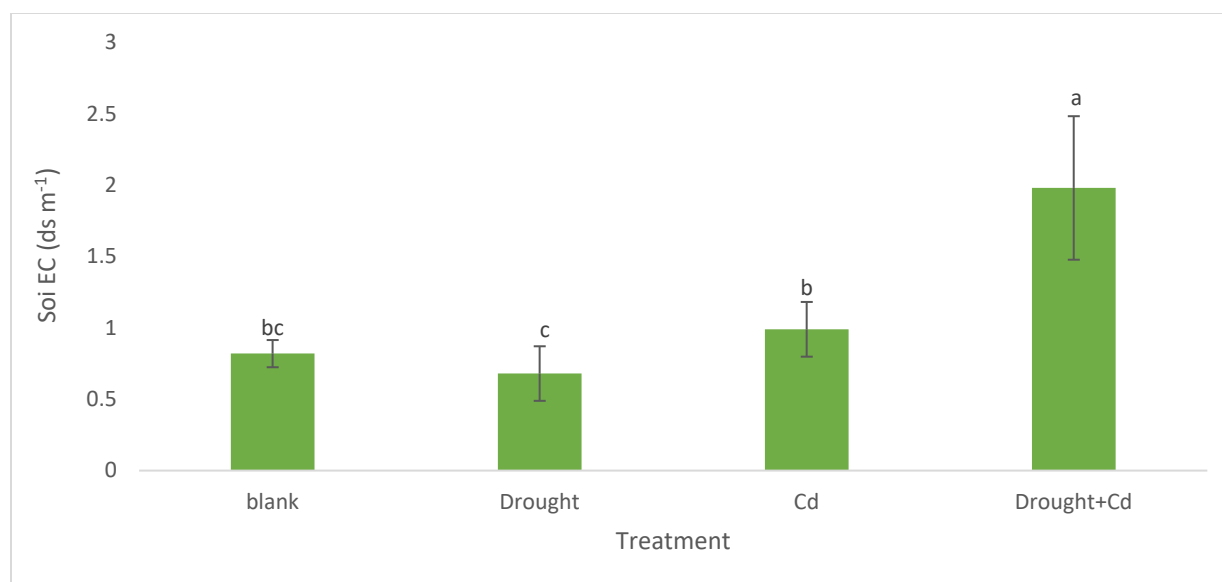

**Figure S1.** Electrical conductivity (Ec) variation in soil at the end of the experiment. Mean values with the same letters are not significantly different ( $p < 0.05$ ), according to LSD's test. Abbreviations: Cd stands for Cadmium stress.

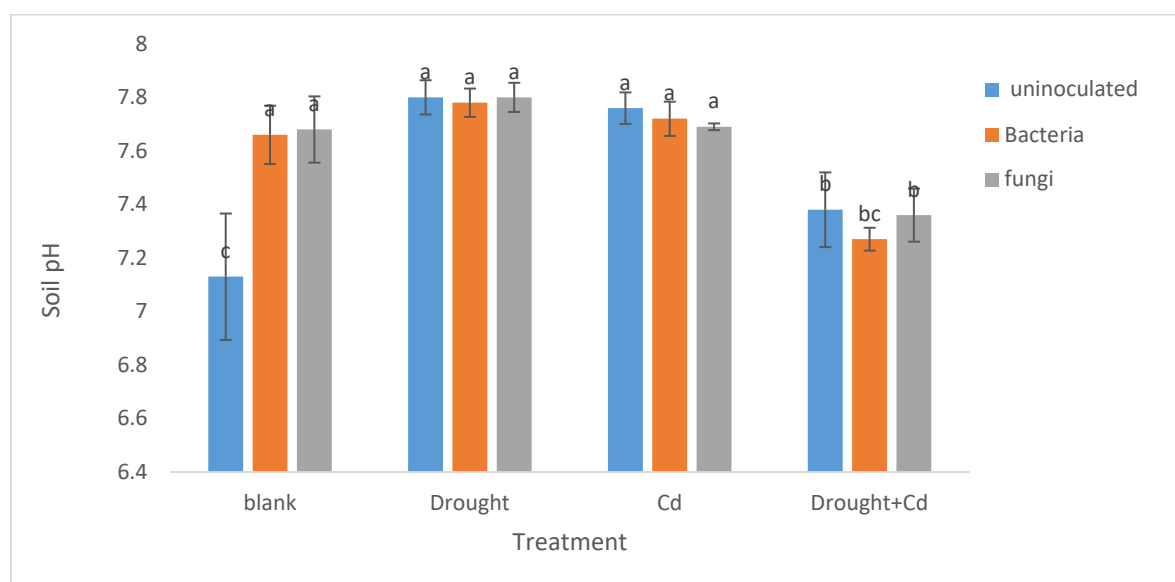

**Figure S2.** pH variation in soil at the end of the experiment. Mean values with the same letters are not significantly different ( $p < 0.05$ ), according to LSD's test. Abbreviations: Cd stands for Cadmium stress.
